# Supplementary material for: Targeting Integrin α3 Blocks β1 Maturation, Triggers Endoplasmic Reticulum Stress, and Sensitizes Glioblastoma Cells to TRAIL-Mediated Apoptosis
Source: MDPI journal article supplement (doi:10.3390/cells13090753), 2024-04-26
Supplement: s1 [file s1]

## Supplementary Materials and Methods

### Reagents

#### Short-interfering RNAs:

Transient siRNA knockdown for all integrin subunits and control treatment were carried out using the following validated siRNAs. Silencer Select siRNAs (Thermo Fisher Scientific, Waltham, MA, USA): ITGA3 (#4390824 ID: s7542, and #4427038 ID: s7543; s7542 was mainly used in this study), ITGA1 (#4390824 ID: s7532), ITGA4 (#4390824 ID: s7545), ITGA5 (#4390824 ID: s7547), ITGA7 (#4390824 ID: s7552), and ITGAV (#4390824 ID: s7570). Silencer pre-designed siRNAs (Thermo Fisher Scientific): ITGA9 (#AM16708, ID: 114980). Santa Cruz Biotechnology (SCBT; Dallas, TX, USA) siRNAs: ITGA2 (sc-29371), ITGA6 (sc-43129), ITGA8 (sc-35688), ITGA10 (sc-88849), ITGA11 (sc-90047), ITGB1 (sc-35674), BAX (sc-29212), Talin-1 (sc-36610), FAK (sc-29310), DR5 (sc-40237), and Control siRNA-A (sc-37007). All siRNAs were transfected in the cells at 30 nM concentration.

#### Antibodies:

Integrin  $\alpha$ 3 (sc-374242),  $\alpha$ 4 (sc-14008),  $\alpha$ 5 (sc-10729),  $\beta$ 1 (sc-374429), BAX (sc-23959), caspase 3 (sc-7148), and  $\beta$ -actin (sc-69879) antibodies were purchased from SCBT and the dilution that was used in immunoblot assays was 1:500, except for  $\alpha$ 3 and  $\beta$ -actin (1:2000). Integrin  $\alpha$ v (#4711), PARP (#9542), c-PARP (#5625), phospho-Akt (S473, #4060), Akt (#9272), Talin (#4021), FAK (#13009), caspase 8 (#9746), caspase 9 (#9502), DR5 (#8074), and BiP (#3177) antibodies were purchased from Cell Signaling Technology (CST; Danvers, MA, USA) and diluted to 1:1000 for immunoblot analyses. Goat anti-rabbit or mouse secondary antibodies were purchased from Thermo Fisher Scientific (#31460 and #31430, respectively). For immunoprecipitation assays, 5  $\mu$ g of mouse IgG (sc-2025, SCBT), rabbit IgG (sc-2027, SCBT),

DR5, and integrin  $\beta$ 1 antibodies were used.

#### Chemicals:

TRAIL (310-04, Peprotech, Cranbury, NJ, USA) used at 100  $\mu$ g/ml in media. Caspases inhibitors: Caspase-3/7 Inhibitor (218826, Sigma-Aldrich, Burlington, MA, USA), caspase-8 Inhibitor Z-IETD-FMK (sc-3084, SCBT), and pan-caspase inhibitor Z-VAD-FMK (sc-3067, SCBT). ER stress inhibitors: Salubrinal (PERK inhibitor, sc-202332, SCBT) and STF083010 (IRE inhibitor, sc-474562, SCBT)

#### Plasmids:

Expression vectors for the following proteins were used: wild type integrin  $\alpha$ 3 and ITGA3-mut 5 (Vectorbuilder, Chicago, IL, USA) contains five silent mutations in the target region for si $\alpha$ 3 (ID: s7542). WT ITGA3 (from codon 2772) 5'-ACC AAC GTG ACT GTG AAG GCA-3', mut 5 (2772) 5'-ACA AAT GTG ACC GTG AAA GCC-3'.

#### Primers:

Human DR5: 5'-CAAGACCCTTGTGCTCGTTGT-3' (forward) and 5'-GACACATTCGATGTCACTCCA-3' (reverse)

Human integrin  $\alpha$ 3 (ITGA3): 5'-GGTACACGATGCAGGTAGGC-3' (forward) and 5'-TTCAAACGGAGCTCCCACAG-3' (reverse)

Human glyceraldehyde-3-phosphate dehydrogenase (GAPDH): 5'-TGAAGGTCGGAGTCAACGGATTTGGT-3' (forward) and 5'-CATGTGGGCCATGAGGTCCACCAC-3' (reverse)

## **Methods**

**Cycloheximide (CHX) chase assay**

The protein stability of DR5 was determined by treating LN229 cells with cycloheximide (CHX #01810, Sigma-Aldrich, 200 µg/ml final concentration in culture media) 48h post transfection with siRNAs. Total cell extracts were harvested at 0,1,2,3,4 and 6 hours post CHX treatment. Cells were lysed in 2X Laemmli buffer (#1610737, BioRad, Hercules, CA, USA) and boiled at 95 °C for 5 min before SDS-PAGE electrophoresis. Relative DR5 protein levels were determined by densitometry analysis with imageJ software version 1.53k (<https://imagej.nih.gov/ij/>) and normalized to internal control β-actin levels.

## **Supplementary Figure legends**

### **Supplementary Figure S1**

#### **Silencing of integrin $\alpha 3$ induces cancer cells-specific apoptosis.**

LN229 human GBM cells were transfected with indicated siRNAs (30 nM) and cell extracts analyzed by immunoblotting 48h later unless otherwise indicated.

**A.** Immunoblot analysis of human glioma cell lines LN-319, LN751, LN444, and LN229 treated with sia3 (30 nM) for 72h. Cells were switched to serum-free medium 48h after transfection and harvested 24h later. Note sia3-mediated induction of apoptosis as detected by cleaved PARP.

**B.** Immunoblot analysis shows sia3 (30 nM; 48h) activates PARP cleavage (\*) in several human cancer cell lines. Note induction of cPARP is independent of p53.

**C.** Immunoblot analysis of LN229 cells grown for 24h +/- serum starvation followed by 48h sia3 or siβ1 transfection (30 nM). Note increased sia3-mediated PARP cleavage under serum starvation.

**D.** Immunoblot analysis of LN229 cells 48h after transfection with indicated siRNAs (30 nM). Note reduced cleaved PARP (\*) upon Bax knockdown.

**E.** (Left panel) Cell viability of LN229 and BEAS-2B cells 48h and 96h post siRNA transfection (30 nM). Student's t test (\*\*\*;  $p < 0.001$ ). (Middle panel) Caspase 3/7 Glo assay in normal lung BEAS-2B cells following 48h transfection with indicated siRNAs (30 nM). Pan-caspase inhibitor Z-VAD (20  $\mu$ M) was added 24h post-transfection. UV treatment (60 mJ/cm<sup>2</sup>) was used as a positive control to induce caspase 3/7 activity. (Right panel) Immunoblot of LN229 and normal human lung BEAS-2B cells after 96h sia3 treatment (30 nM).

### **Supplementary Figure S2**

#### **DR5 mediates integrin $\alpha 3$ -targeted cell killing.**

- A.** SRB cell survival assay of indicated cell lines treated for 24h with TRAIL (100 ng/mL), translation inhibitor cycloheximide (CHX; 20  $\mu$ M), or both.
- B.** Hoechst 33342 staining of LN229 cells transfected with siCtrl,  $\alpha$ 3,  $\beta$ 1, or si $\alpha$ 3/ $\beta$ 1 (30 nM, 96h) +/- TRAIL treatment (100 ng/mL, added 24h after siRNA transfection).
- C.** Immunoblot analysis of LN229 cells transfected with si $\alpha$ 3 or siCtrl (30 nM) for 40h. TRAIL (100 ng/ml) +/- Cycloheximide (CHX, 20  $\mu$ M) were added 24h post-transfection. Note that si $\alpha$ 3 sensitizes cells to TRAIL-mediated cleavage of Caspases 8 and 9 (\*active forms).
- D.** Immunoblot analysis of human colorectal cancer HCT116 cell line 48h after si $\alpha$ 3, si $\beta$ 1, or siCtrl transfection (30 nM). Note potent activation of cPARP and reduced  $\beta$ 1 integrin maturation in si $\alpha$ 3 treated cells.
- E.** Caspase 8 Glo assay in LN229 cells 48h after transfection of indicated siRNAs (30 nM). Note: addition of Caspase 8 inhibitor Z-IETD (20  $\mu$ M) 4h post-transfection prevented si $\alpha$ 3-mediated caspase 8 activation.
- F.** Immunoblot analysis of LN229 cells transfected with si $\alpha$ 3 or siCtrl (30 nM) for 48h. TRAIL (100 ng/ml) was added 24h post-transfection. Cells were treated with caspase inhibitors (20  $\mu$ M) 1h before transfection.
- G.** Cycloheximide (CHX) chase assay to measure DR5 stability post si $\alpha$ 3 treatment (30 nM; 48h) in LN229 cells. (top panel) Immunoblot analysis with time course following translational block with CHX treatment (100  $\mu$ g/ml). (bottom panel) Quantification of DR5 degradation kinetics with ImageJ.
- H.** Immunoblot analysis of LN229 cells transfected with si $\alpha$ 3 or siCtrl (30nM) for 96h. TRAIL (100 ng/ml) and kifunensine (5  $\mu$ M) were added 48h post-transfection.
