# Supplementary figures and images for: Targeting Integrin α3 Blocks β1 Maturation, Triggers Endoplasmic Reticulum Stress, and Sensitizes Glioblastoma Cells to TRAIL-Mediated Apoptosis
Source: MDPI journal article supplement (doi:10.3390/cells13090753), 2024-04-26

Supplementary Figure S1

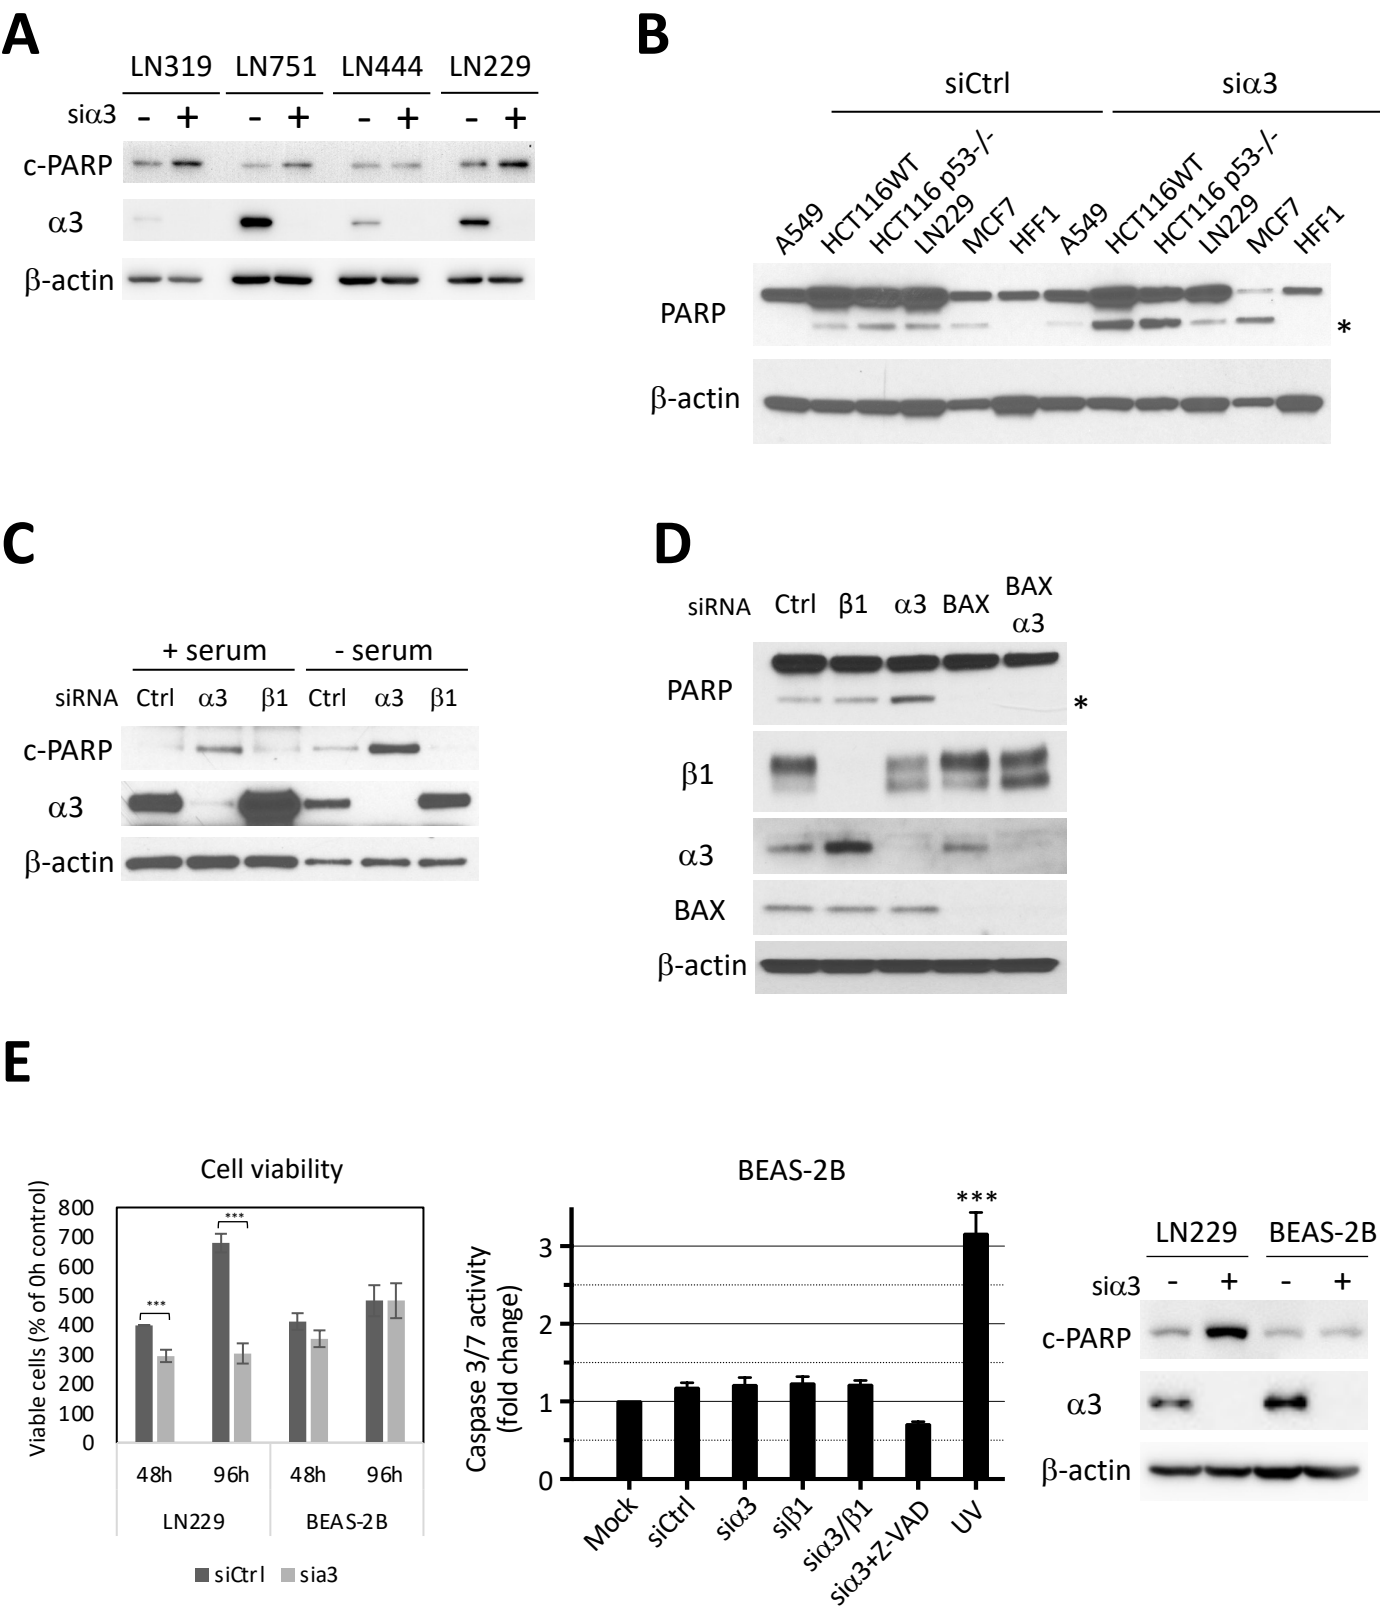

# Supplementary Figure S2

## A

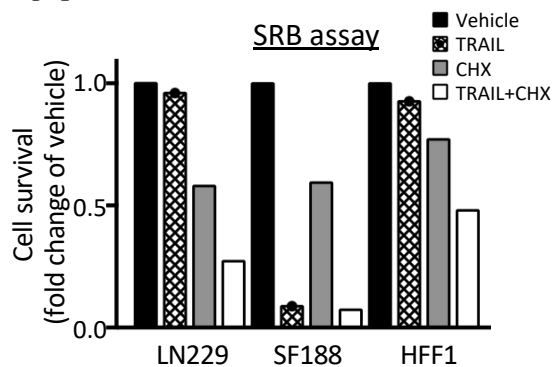

## B

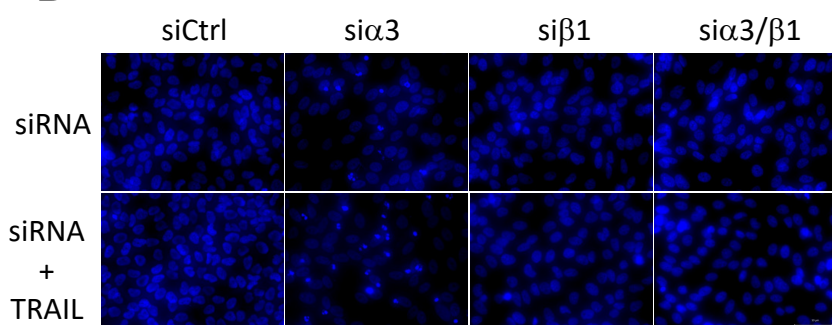

## C

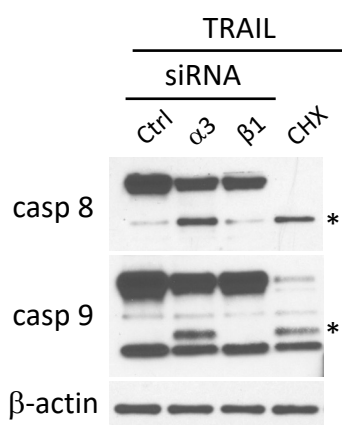

## D

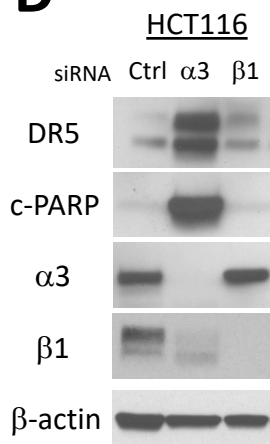

## E

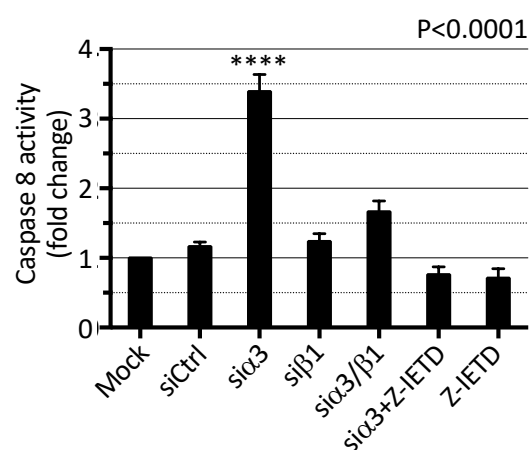

## F

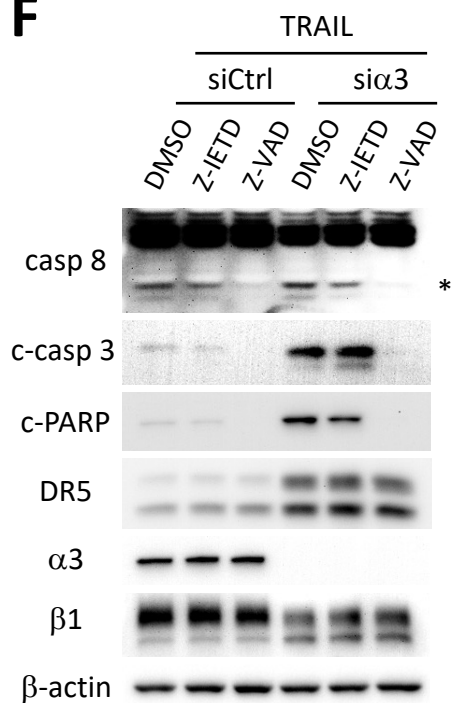

## G

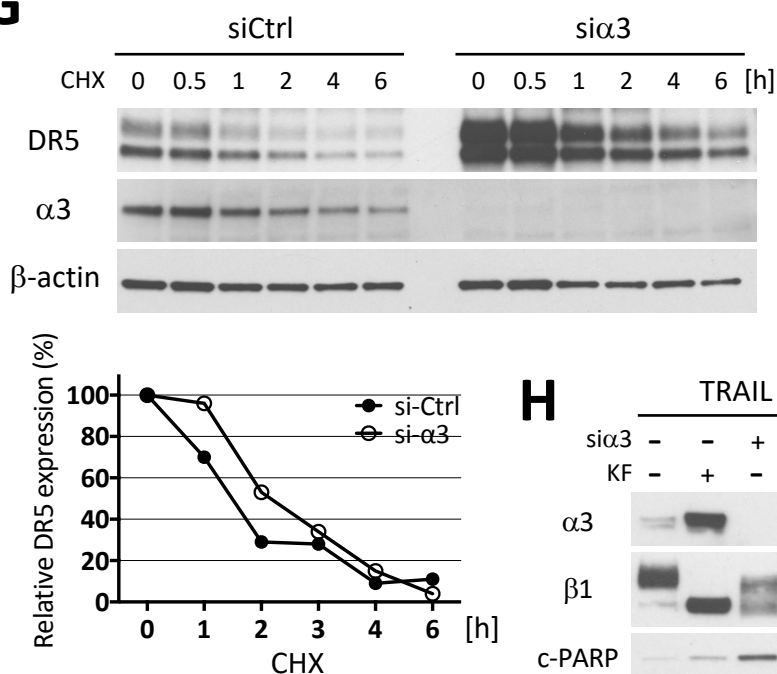

## H

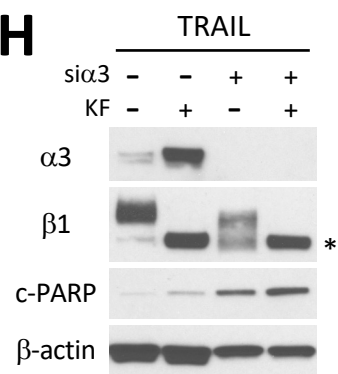

Supplement: s1 [file s1]
